# Supplementary material for: Manganese is critical for antitumor immune responses via cGAS-STING and improves the efficacy of clinical immunotherapy
Source: PubMed Central journal article supplement (PMC7785004; doi:10.1038/s41422-020-00395-4), 2020-08-24
Supplement: 41422_2020_395_MOESM2_ESM.pdf [file 41422_2020_395_MOESM2_ESM.pdf]

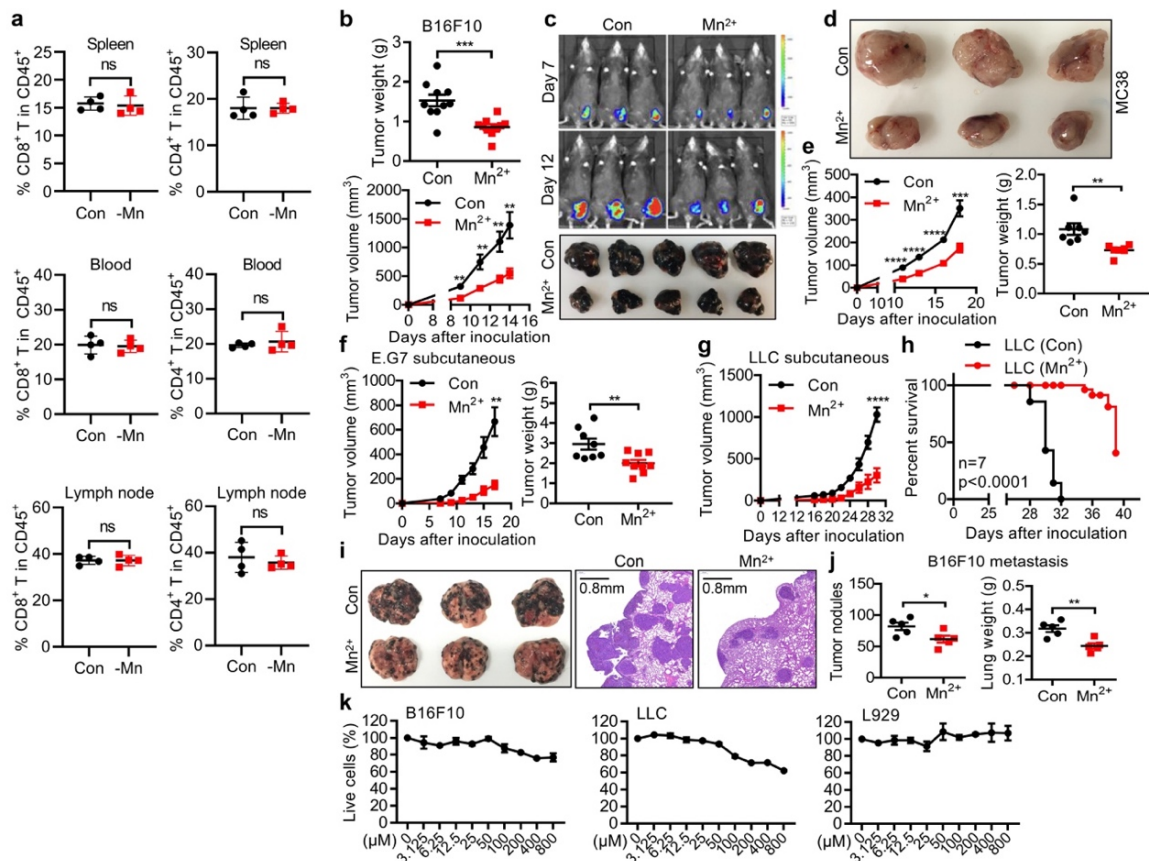

**Supplementary Fig. 1 Mn<sup>2+</sup> promotes antitumor immune responses. a** Frequency of CD8<sup>+</sup> T and CD4<sup>+</sup> T cells in spleen, blood and inguinal lymph node from control (Con) and Mn-insufficient mice (-Mn). **b** Tumor weights and tumor sizes of B16F10 tumors from the wild-type C57BL/6 (WT) mice treated with 5 mg/kg MnCl<sub>2</sub> intranasally (i.n.) with saline as control (n=10) once every two days after injection of 5 × 10<sup>5</sup> B16F10 subcutaneously (s.c.), tumors were dissected and assessed at day 14 after inoculation. **c** Representative images (top) of *in vivo* bioluminescence of tumors in the right groin of WT mice at day 7 and day 12, mice (n=5 per group) were treated with saline or 5 mg/kg MnCl<sub>2</sub> i.n. once every two days after subcutaneous injection of 5 × 10<sup>5</sup> B16F10 cells. These mice were sacrificed at day 14, tumors were dissected and photographed (bottom). **d** Representative images of MC38 tumors from WT mice treated with 5 mg/kg MnCl<sub>2</sub> intravenously (i.v.) with PBS as control (n=7) once every two days after subcutaneous injection of 1 × 10<sup>6</sup> MC38 cells, tumors were dissected and assessed at day 18 after inoculation. **e** Tumor weights and tumor sizes of MC38 tumors from WT mice as in (d). **f** Tumor sizes in WT mice treated with saline or 5 mg/kg MnCl<sub>2</sub> i.n. once every two days after subcutaneous injection of 1 × 10<sup>6</sup> E.G7 cells on day 0 (n=5 per group, left), tumors were dissected and weighted at day 18 after inoculation (Con, n=8; Mn, n=9, right). **g**, **h** Tumor size (g) and survival (h) of WT mice treated with saline or 5 mg/kg MnCl<sub>2</sub> i.n. once every two days after subcutaneous injection of 1 × 10<sup>6</sup> LLC cells on day 0 (n=7 per group). **i**, **j** Representative images (i) and quantification (j) of tumor nodules and lung weights of saline or 5 mg/kg MnCl<sub>2</sub> treated mice (i.n., n=5 per group) at day 15 after intravenous injection of 2 × 10<sup>5</sup> B16 cells. **k** MTT staining of B16F10, LLC or L929 treated with the indicated concentrations of MnCl<sub>2</sub> for 24 h. Data represent analyses of the indicated n mice per group, mean ± SEM. Data are representative of three independent experiments. ns, not significant; \*p < 0.05, \*\*p < 0.01, \*\*\*p < 0.001, \*\*\*\*p < 0.0001.
