# Supplementary material for: Manganese is critical for antitumor immune responses via cGAS-STING and improves the efficacy of clinical immunotherapy
Source: PubMed Central journal article supplement (PMC7785004; doi:10.1038/s41422-020-00395-4), 2020-08-24
Supplement: 41422_2020_395_MOESM3_ESM.pdf [file 41422_2020_395_MOESM3_ESM.pdf]

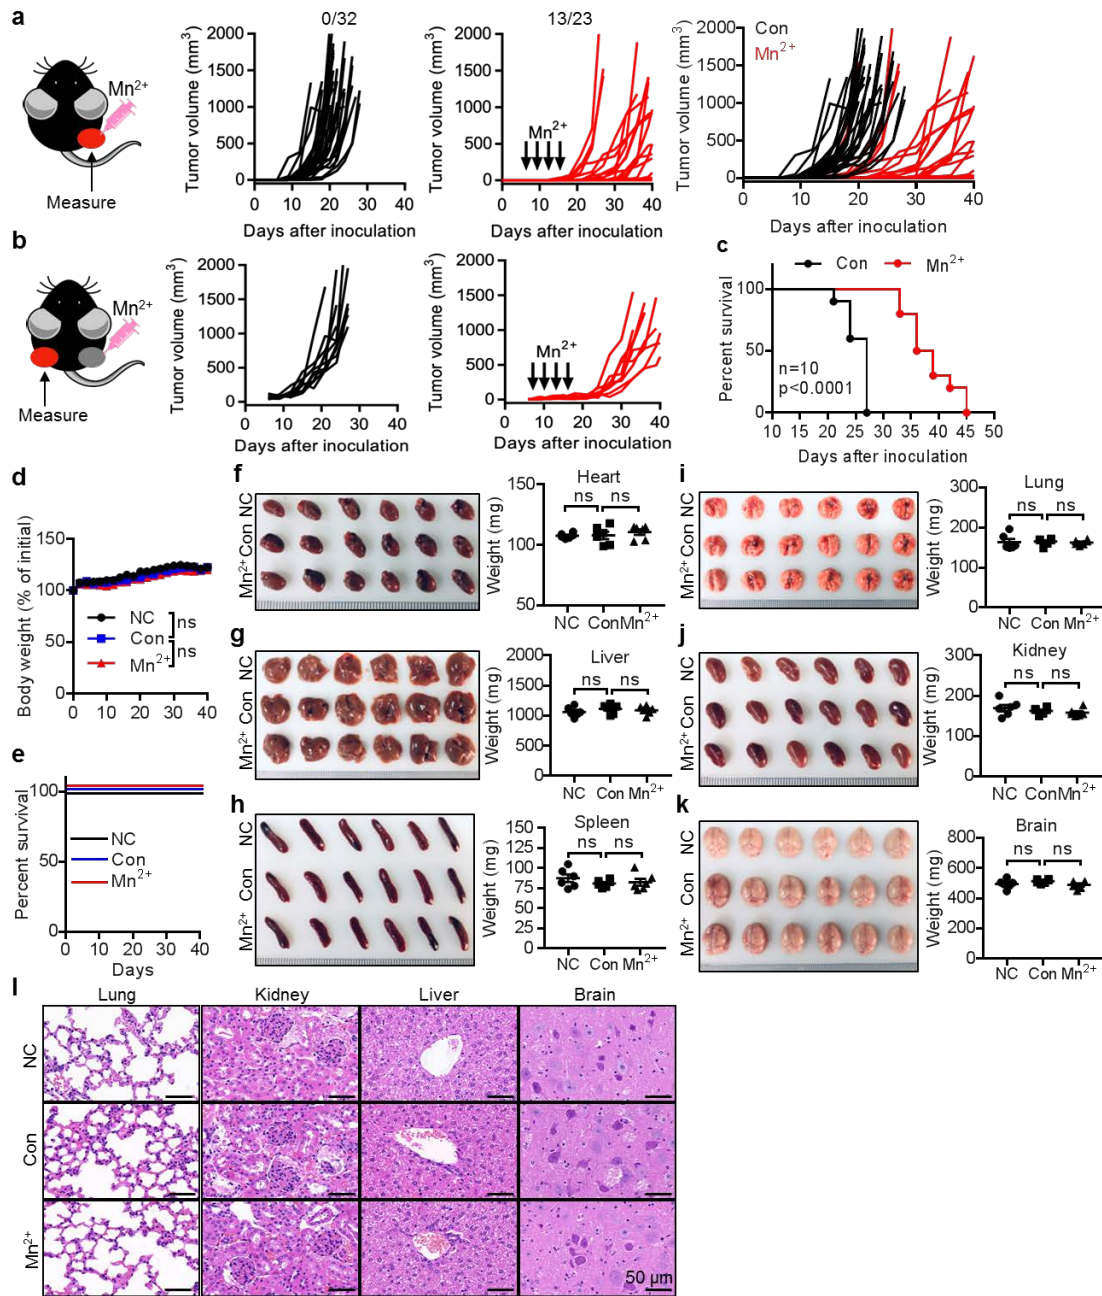

**Supplementary Fig. 2**  $Mn^{2+}$  is a potent chemotherapeutic agent without detectable toxicity to mice. **a** The WT mice were treated with saline or 5 mg/kg  $MnCl_2$  intratumorally (i.t.) at day 8, 10, 12, 14 after subcutaneous inoculation of  $3 \times 10^5$  B16-OVA cells in the right groin (Con,  $n=32$ ;  $Mn^{2+}$ ,  $n=23$ ), the sizes of tumor were recorded. No mice (0/32) in the control group and 13 mice (13/23) in  $Mn^{2+}$ -treated group survived over 40 days. **b, c** The WT mice were subcutaneously inoculated with  $1.5 \times 10^5$  B16-OVA cells in both left and right groin respectively, one side of tumors was treated with saline or 5 mg/kg  $MnCl_2$  i.t. at day 8, 10, 12, 14 after inoculation (Con,  $n=10$ ;  $Mn^{2+}$ ,  $n=10$ ), the sizes of tumors on the non-treated side were recorded (**b**). Their survival rates were monitored everyday (**c**). **d, e** The WT mice ( $n=6$ ) were left untreated (NC) or treated with saline (Con,  $n=6$ ) or 5mg/kg  $MnCl_2$  ( $Mn^{2+}$ ,  $n=6$ ) i.n. on day 0, 2, 4, 6, 8, 10 and 12. Their body weights (**d**) were monitored every two days and their survival rates (**e**) were monitored every day. **f-k** On day 40, hearts (**f**), livers (**g**), spleens (**h**), lungs (**i**), kidneys (**j**) and brains (**k**) were removed

and organ weights were recorded. I HE staining of livers, lungs, kidneys, and brains dissected from (g, i, j, k). Data represent analyses of the indicated n mice per group, mean  $\pm$  SEM. Data are representative of three independent experiments. ns, not significant; \*\*\*\*p <0.0001.
