# Supplementary material for: Manganese is critical for antitumor immune responses via cGAS-STING and improves the efficacy of clinical immunotherapy
Source: PubMed Central journal article supplement (PMC7785004; doi:10.1038/s41422-020-00395-4), 2020-08-24
Supplement: 41422_2020_395_MOESM4_ESM.pdf [file 41422_2020_395_MOESM4_ESM.pdf]

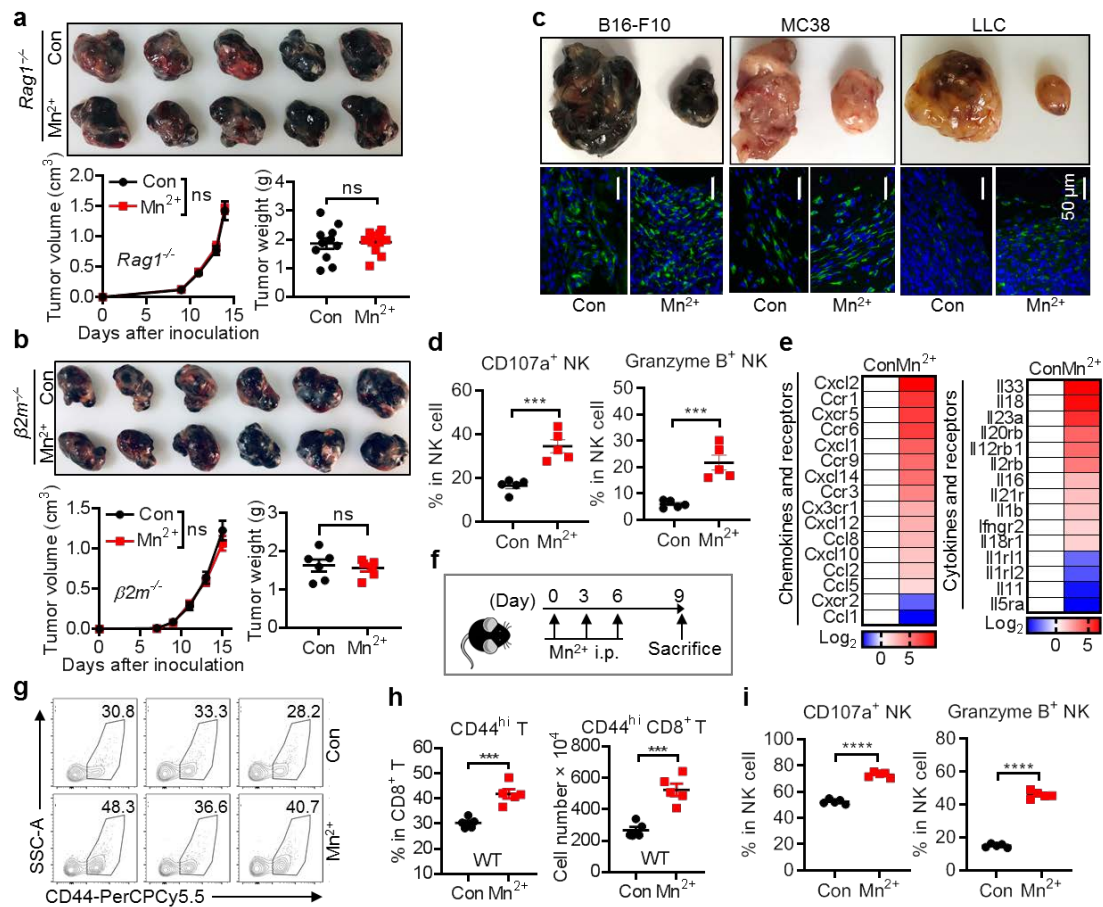

**Supplementary Fig. 3 Mn<sup>2+</sup> stimulates CD8<sup>+</sup> T cell and NK cell activation.** **a** Representative images of tumors (top), tumor sizes and tumor weights (bottom) in *Rag1*<sup>-/-</sup> mice (n=11 per group) treated with saline or 5 mg/kg MnCl<sub>2</sub> i.n. at various days as indicated after subcutaneous inoculation of  $5 \times 10^5$  B16F10 cells. **b** Images of tumors (top), tumor sizes and tumor weights (bottom) in  $\beta 2m^{-/-}$  mice (n=6 per group) treated with saline or 5 mg/kg MnCl<sub>2</sub> i.n. at various days as indicated after subcutaneous inoculation of  $5 \times 10^5$  B16F10 cells. **c** Representative images and immunofluorescence slices of tumors in mice subcutaneously inoculated with B16F10 (left), MC38 (middle) or LLC (right). **d** The WT mice were subcutaneously inoculated with  $2 \times 10^5$  B16F10 cells and treated with saline or 5 mg/kg MnCl<sub>2</sub> i.p.. Mice (n=5 per group) were sacrificed on day 16 and tumors were dissected for FACS analysis. The percentage of NK cells expressing CD107a and Granzyme B was assessed. **e** Heatmap of selected genes between CD8<sup>+</sup> TILs from saline (Con) and Mn<sup>2+</sup> treated (i.n.) mice. Heat map was made by calculating log<sub>2</sub> ((Mn FPKM)/(Con FPKM)) and values of genes in the control group were normalized to zero. **f-h** Experimental protocol used in (g, h): WT mice (n=5 per group) were given 5 mg/kg MnCl<sub>2</sub> intraperitoneally (i.p.) at the indicated times and sacrificed at day 9. Frequency (g) and cell number (h) of CD44<sup>hi</sup>CD8<sup>+</sup> T among splenic cells in WT mice (f). **i** Quantification of CD107a<sup>+</sup> NK and Granzyme B<sup>+</sup> NK in NK cells isolated from mouse spleens treated with 600  $\mu$ M MnCl<sub>2</sub> for 18 h. The data represent analyses of n mice per group, mean  $\pm$  SEM. Data represent analyses of the indicated n mice per group, mean  $\pm$  SEM. Data are representative of three independent experiments. ns, not significant; \*\*\*p < 0.001; \*\*\*\*p < 0.0001.
