# Supplementary material for: Manganese is critical for antitumor immune responses via cGAS-STING and improves the efficacy of clinical immunotherapy
Source: PubMed Central journal article supplement (PMC7785004; doi:10.1038/s41422-020-00395-4), 2020-08-24
Supplement: 41422_2020_395_MOESM5_ESM.pdf [file 41422_2020_395_MOESM5_ESM.pdf]

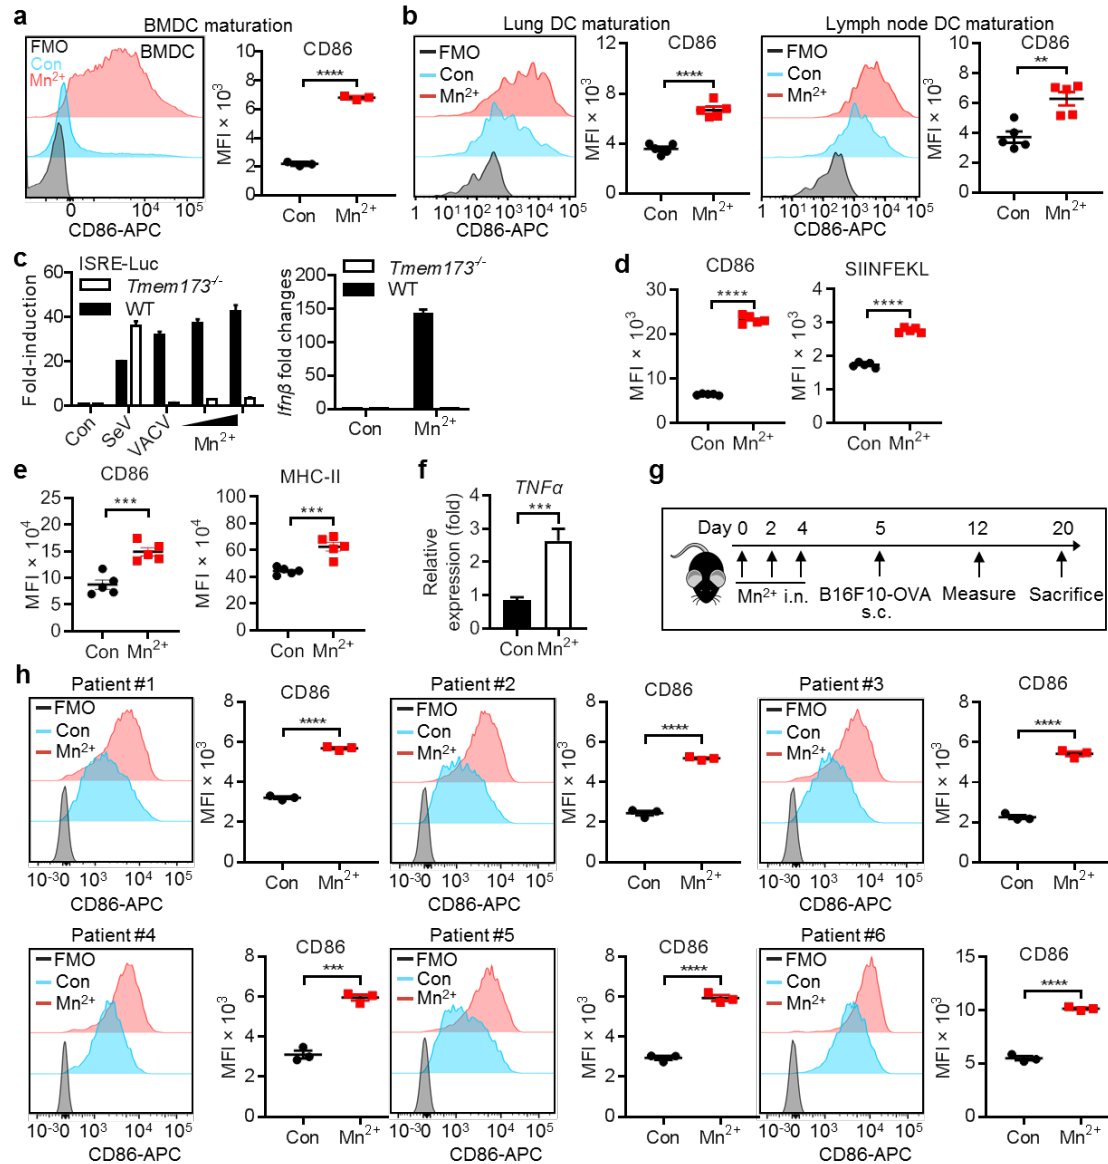

**Supplementary Fig. 4**  $Mn^{2+}$  promotes DC maturation and antigen presentation. **a** Mean fluorescent intensity (MFI) of CD86 in BMDCs treated with 400  $\mu M$   $MnCl_2$  for 18 h. **b** Mean fluorescent intensity (MFI) of CD86 in lung DCs ( $MnCl_2$  i.n.) or inguinal lymph node DCs ( $MnCl_2$  s.c.) from mice ( $n=5$  per group) treated with 5 mg/kg  $MnCl_2$  for 18 h. **c** Type I IFN activity in culture media from the WT or *Tmem173*<sup>-/-</sup> bone marrow derived macrophages (BMDMs) treated with SeV, VACV, LPS or the indicated concentrations (200  $\mu M$  and 400  $\mu M$ ) of  $MnCl_2$  for 18 h (left). qRT-PCR analysis of *Ifn $\beta$*  in BMDM treated with or without  $MnCl_2$  (Right). **d** Mean fluorescent intensity (MFI) of CD86 and SIINFEKL in bone marrow-derived macrophage (BMDMs) treated with 400  $\mu M$   $MnCl_2$  for 18 h. **e** The WT mice were subcutaneously inoculated with  $2 \times 10^5$  B16F10 cells and treated with saline or 5 mg/kg  $MnCl_2$  i.p.. Mice ( $n=5$  per group) were sacrificed on day 16 and tumors were dissected for FACS analysis. The expression of CD86 and MHC-II on tumor-infiltrating macrophages was quantified. **f** qRT-PCR analysis of *Tnf $\alpha$*  in alveolar macrophages from mice treated with saline or 5 mg/kg  $MnCl_2$  i.n. for 18 h. **g** Experimental protocol used in Fig. 3h, i. **h** Mean fluorescent intensity (MFI) of CD86 in DCs of PBMCs from various types of cancer patients (See details in supplementary Table 3) treated with

100  $\mu\text{M}$   $\text{MnCl}_2$  for 18 h. Representative results were shown. FMO: Flow Minus One of CD86.  
Data are represented as mean  $\pm$  SEM. \*\*  $p < 0.01$ ; \*\*\* $p < 0.001$ ; \*\*\*\* $p < 0.0001$ .
