# Supplementary material for: Manganese is critical for antitumor immune responses via cGAS-STING and improves the efficacy of clinical immunotherapy
Source: PubMed Central journal article supplement (PMC7785004; doi:10.1038/s41422-020-00395-4), 2020-08-24
Supplement: 41422_2020_395_MOESM6_ESM.pdf [file 41422_2020_395_MOESM6_ESM.pdf]

**a**

*Cgas*<sup>-/-</sup>: 85bp deletion between gRNA1 and gRNA2.

```
cGas-KO  CGTACGGGAGCCCCAGCCCC-----  
cGas-WT  CGTACGGGAGCCCCAGCCGCCGCGGATCCCGAGGCGCGGAAAGTCGTAAGGGGACC  
                                         AGGGTCCAGGAAGGAAC  
TAGCCACAGAAGGGGCGCGCTCCACC GGGCAGCCAGAGCGCCGAGGGTCCAGGAAGGAAC
```

*Tmem173*<sup>-/-</sup>: 1bp deletion at gRNA1 and 1bp insertion at gRNA2 leading to premature stop codon between two gRNAs.

```
Sting-WT  ACCTGCATCCAGCCATCCCACGGCCAGAGGTCACCCGTCCTCAAATATGTAGCCCTC  
Sting-KO  ACCTGCATCCAGCCATCCCACG-CCCAGAGGTCACCCGTCCTCAAATATGTAGCCCTC  
          TGAAGTACCTAGCACTTCACCTAGCCTCGCA-CGAACTTGGACTACTGTTG  
          TGAAGTACCTAGCACTTCACCTAGCCTCGCAACGAACTTGGACTACTGTTG
```

**b**

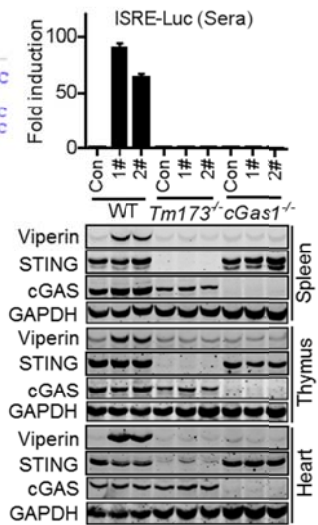

**Supplementary Fig. 5 The cGAS-STING pathway is required for Mn<sup>2+</sup>-mediated antitumor immune responses.** **a** Genotyping of gene-deficient mice in C57BL/6 background. **b** Type I IFN activity in the sera and ISG expression of the indicated organs in MnCl<sub>2</sub> treated (i.v.) WT mice and the indicated gene-deficient mice (n=3 per genotype) for 18 h. Data represent analyses of n mice per group, mean ± SEM.
