# Supplementary material for: Manganese is critical for antitumor immune responses via cGAS-STING and improves the efficacy of clinical immunotherapy
Source: PubMed Central journal article supplement (PMC7785004; doi:10.1038/s41422-020-00395-4), 2020-08-24
Supplement: 41422_2020_395_MOESM7_ESM.pdf [file 41422_2020_395_MOESM7_ESM.pdf]

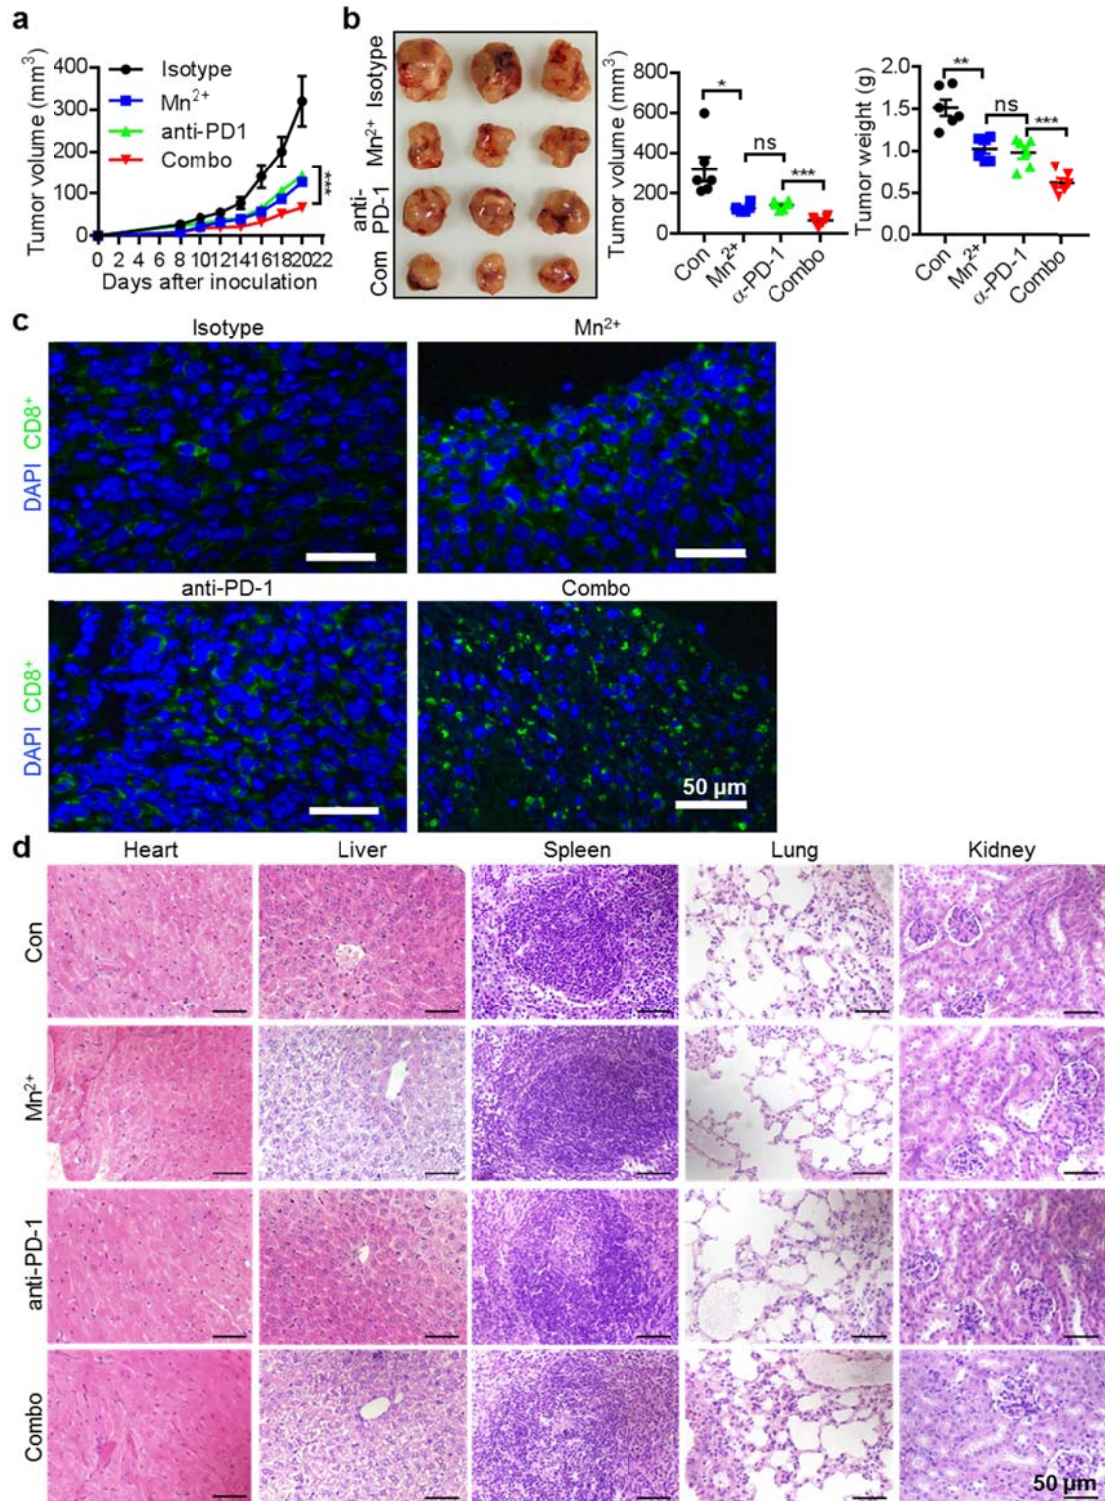

**Supplementary Fig. 6**  $\text{Mn}^{2+}$  boosts antitumor immunotherapy in mice. **a** Tumor sizes of subcutaneous MC38 implants in mice treated with the isotype antibody (200  $\mu\text{g}/\text{mouse}$  i.p.),  $\text{MnCl}_2$  (5 mg/kg i.v.), anti-PD-1 antibody (200  $\mu\text{g}/\text{mouse}$  i.p.) or  $\text{MnCl}_2$  plus anti-PD-1 antibody ( $n=6$  per group). **b** Representative images (left), tumor sizes (middle) and tumor weights (right) of subcutaneous MC38 implants in mice as in (a). **c** MC38 tumors from (b) were stained with anti-CD8-FITC and counterstained with DAPI. Scale bar, 50  $\mu\text{m}$ . **d** The indicated organs from

B16F10 tumor-bearing mice treated with MnCl<sub>2</sub> (5 mg/kg i.p.), anti-PD-1 antibody (200 µg/mouse i.p.) or MnCl<sub>2</sub> plus anti-PD-1 antibody (Combo, n=5 per group) were examined by H & E staining at day 16. Data represent analyses of the indicated n mice per group, mean ± SEM. Data are representative of three independent experiments. ns, not significant, p>0.05; \*p < 0.05; \*\*p < 0.01; \*\*\*p < 0.001.
