# Supplementary material for: Manganese is critical for antitumor immune responses via cGAS-STING and improves the efficacy of clinical immunotherapy
Source: PubMed Central journal article supplement (PMC7785004; doi:10.1038/s41422-020-00395-4), 2020-08-24
Supplement: 41422_2020_395_MOESM8_ESM.pdf [file 41422_2020_395_MOESM8_ESM.pdf]

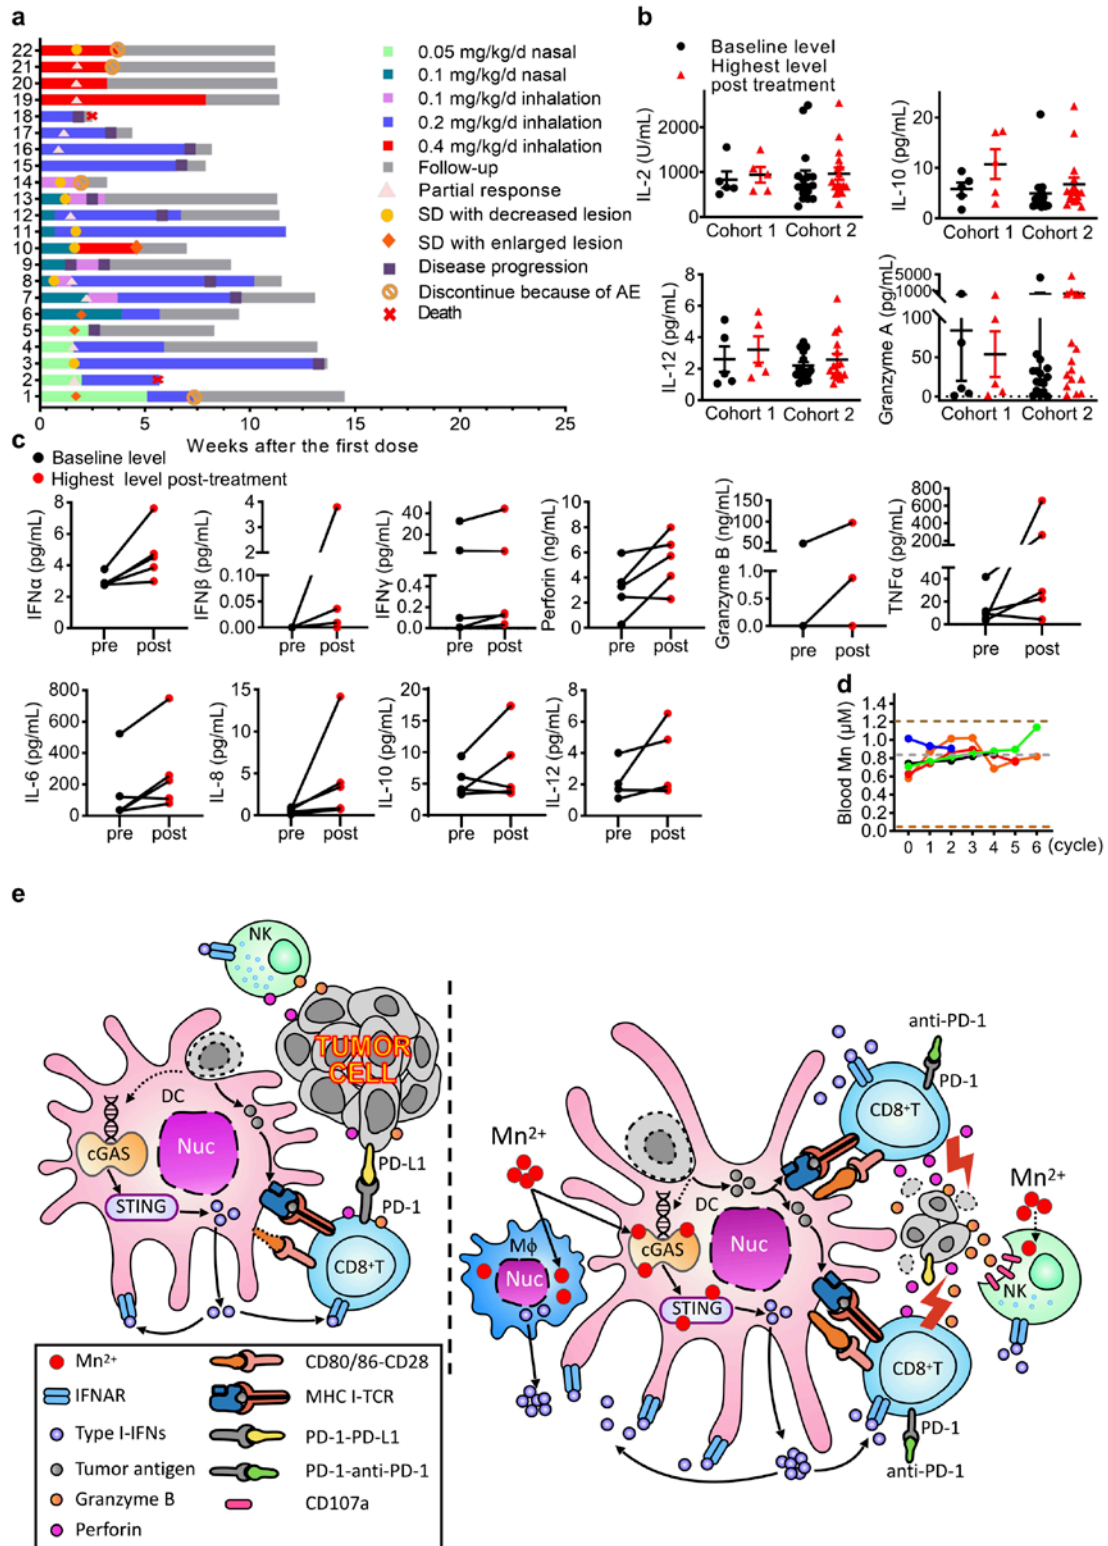

**Supplementary Fig. 7**  $Mn^{2+}$  augments and revives antitumor immunotherapy in multidrug (immuno)-resistant cancer patients. **a** The clinical course is illustrated in this swimmer plot, including the best response, on- or off-treatment status. **b** The baseline and highest post-treatment expression level of serum cytokines and effector proteins of patients grouped according to the blood manganese concentration. Cohort 1 includes the patients with SD-E and PD; cohort 2

includes patients achieving PR and SD-S. **c** The baseline and highest post-treatment expression level of serum cytokines and effector proteins of five metastatic patients with cytokine-release-syndrome (CRS). **d** The level of blood Mn concentration in each patient as in (c) one day before the numbered cycle of Mn<sup>2+</sup> administration and therapy (C1-C4). Dashed lines indicated Mn concentrations within the physiological range (top, 1.2 μM; bottom, 0.029 μM). **e** A working model for Mn<sup>2+</sup> augmented and revived antitumor immunotherapy. In normal conditions, NK cells exerts tumor immunosurveillance, also tumor antigen is taken by DCs which results in CD8<sup>+</sup> T cell priming and activation. However, in cancer patients, there is not enough tumor clearance presumably due to inadequate activation of NK cells and CD8<sup>+</sup> T cells because of the insufficient activation and maturation of antigen-presenting cells (APCs, macrophages, DCs etc.). Mn<sup>2+</sup> sensitizes and activates the cGAS-STING pathway in various cells including macrophages and DCs to produce type I-IFNs that promote not only the function of NK cells, but also APC maturation and antigen presentation, leading to CD8<sup>+</sup> T cell activation. Thus, Mn<sup>2+</sup> administration promotes anti-tumor immune responses by activating both CD8<sup>+</sup> T cells and NK cells for the clearance of CD8<sup>+</sup> T cell-sensitive and CD8<sup>+</sup> T cell-resistant tumors.
