# Supplementary material for: Manganese is critical for antitumor immune responses via cGAS-STING and improves the efficacy of clinical immunotherapy
Source: PubMed Central journal article supplement (PMC7785004; doi:10.1038/s41422-020-00395-4), 2020-08-24
Supplement: 41422_2020_395_MOESM9_ESM.pdf [file 41422_2020_395_MOESM9_ESM.pdf]

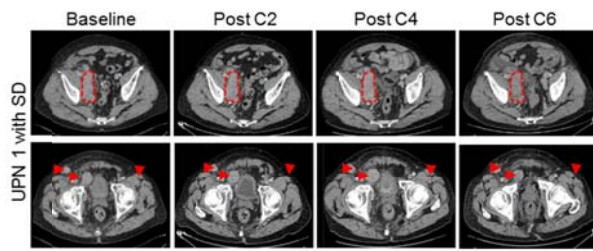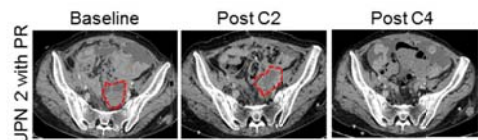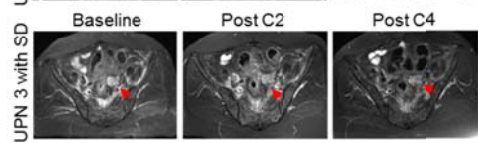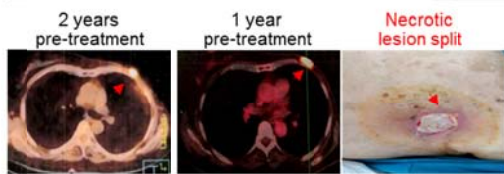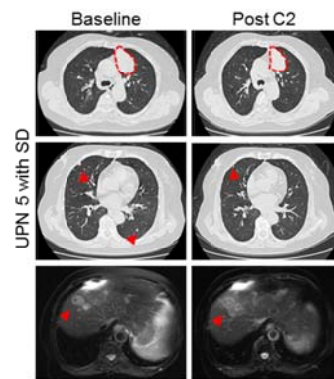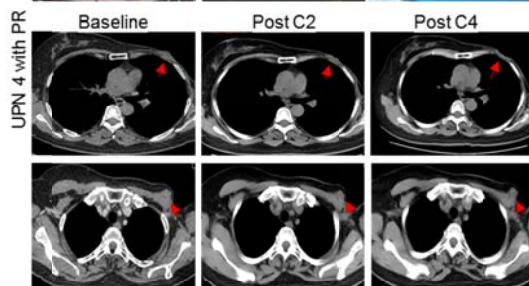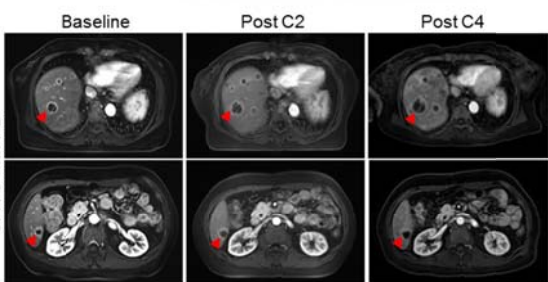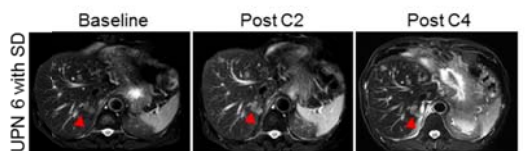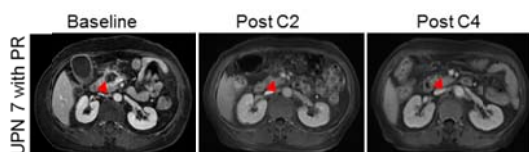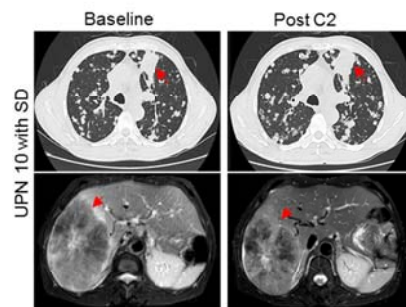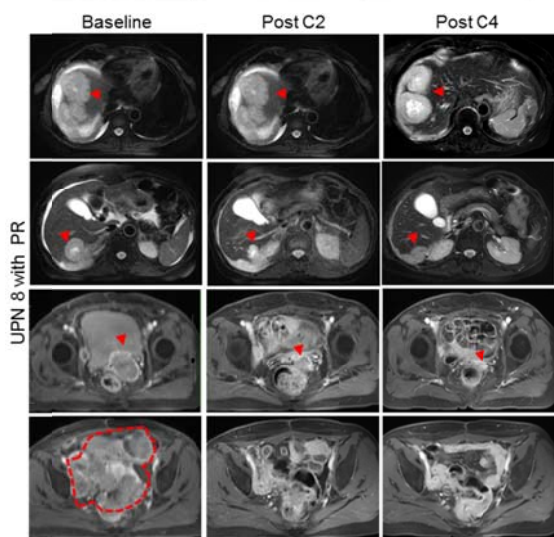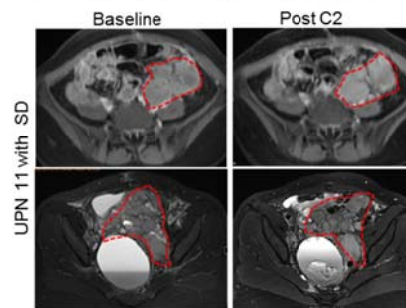

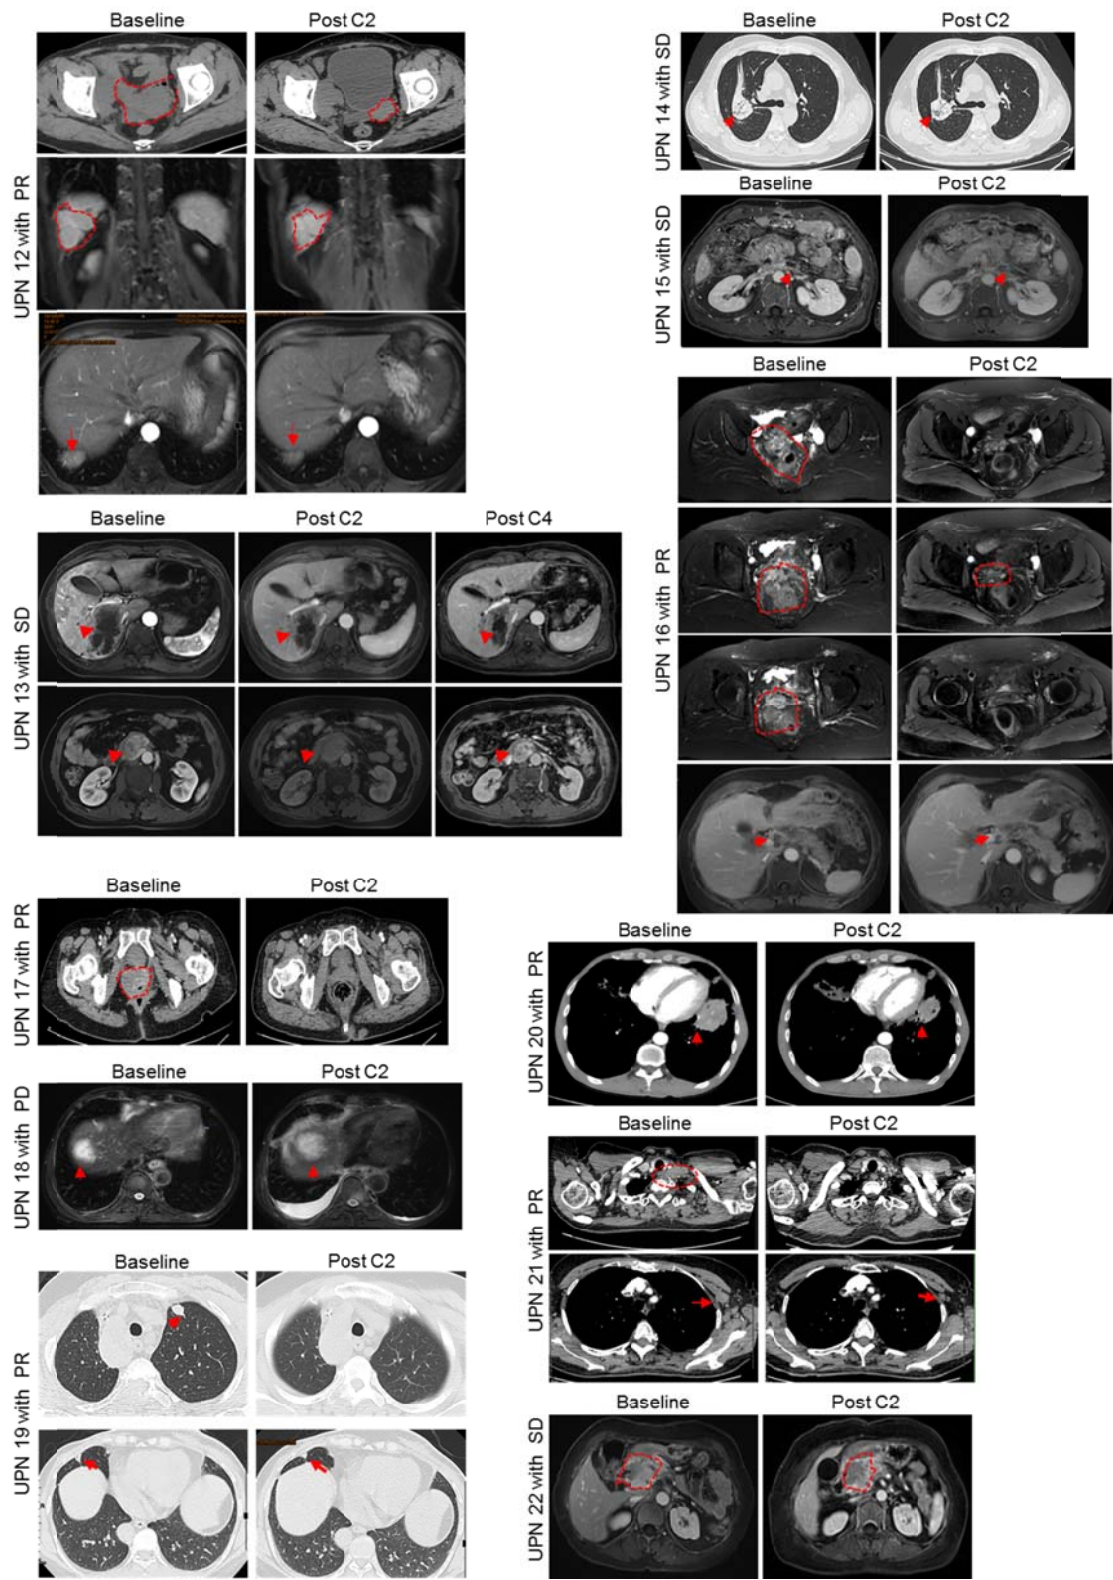

**Supplementary Fig. 8** CT or MRI scans of all evaluated 22 patients. Computed tomography (CT) and/or magnetic resonance imaging (MRI) were performed at baseline and after every 2 cycles of the combined treatment.
