# Supplementary material for: Manganese is critical for antitumor immune responses via cGAS-STING and improves the efficacy of clinical immunotherapy
Source: PubMed Central journal article supplement (PMC7785004; doi:10.1038/s41422-020-00395-4), 2020-08-24
Supplement: 41422_2020_395_MOESM10_ESM.pdf [file 41422_2020_395_MOESM10_ESM.pdf]

**Supplementary Table 1. Quantitative PCR primers**

|        |                      |                         |
|--------|----------------------|-------------------------|
| mIfnb1 | CACAGCCCTCTCCATCAACT | TCCCACGTCAATCTTTCCTC    |
| mTnfa  | GGGTGATCGGTCCCAAAGG  | CTCCACTTGGTGGTTTGCTACGA |
| Gapdh  | TGATGGGTGTGAACCACGAG | TAGGGCCTCTCTTGCTCAGT    |
