# Supplementary material for: Manganese is critical for antitumor immune responses via cGAS-STING and improves the efficacy of clinical immunotherapy
Source: PubMed Central journal article supplement (PMC7785004; doi:10.1038/s41422-020-00395-4), 2020-08-24
Supplement: 41422_2020_395_MOESM11_ESM.pdf [file 41422_2020_395_MOESM11_ESM.pdf]

**Supplementary Table 2. Information of peripheral blood mononuclear cell donors, Related to Figure S4 and Table S4-S5**

| Patient Number | Age | Gender | Types of cancer                          | Mn <sup>2+</sup> Response <i>in vitro</i> | Clinical response |
|----------------|-----|--------|------------------------------------------|-------------------------------------------|-------------------|
| 1              | 46  | Female | Pancreatic cancer                        | Yes                                       | Not Enrolled      |
| 2              | 59  | Female | Rectal cancer                            | Yes                                       | Not Enrolled      |
| 3              | 55  | Female | Pancreatic cancer                        | Yes                                       | Not Enrolled      |
| 4              | 67  | Female | Breast cancer                            | Yes                                       | Not Enrolled      |
| 5              | 75  | Male   | Kidney cancer                            | Yes                                       | Not Enrolled      |
| 6              | 44  | Male   | Pancreatic cancer                        | Yes                                       | Not Enrolled      |
| 7              | 73  | Female | Squamous Cell Carcinoma - Base of Tongue | Yes                                       | Not Enrolled      |
| 8 (UPN13)      | 41  | Male   | Cholangiocarcinoma                       | Yes                                       | SD-S              |
| 9              | 60  | Male   | Pancreatic cancer                        | Yes                                       | Not Enrolled      |
| 10             | 61  | Male   | Cancer of the gastric cardia             | No                                        | Not Enrolled      |
| 11 (UPN9)      | 50  | Female | Cholangiocarcinoma                       | Yes                                       | PD                |
| 12 (UPN8)      | 58  | Female | Fallopian tube cancer                    | Yes                                       | PR                |
| 13 (UPN7)      | 63  | Female | Pancreatic cancer                        | Yes                                       | PR                |
| 14             | 36  | Female | Breast cancer                            | Yes                                       | Not Enrolled      |
| 15             | 40  | Male   | Floor of mouth cancer                    | Yes                                       | Not Enrolled      |
| 16             | 50  | Female | Colon cancer                             | No                                        | Not Enrolled      |
| 17             | 47  | Male   | Gastric cancer                           | Yes                                       | Not Enrolled      |
| 18 (UPN18)     | 69  | Male   | Pancreatic cancer                        | Yes                                       | PD                |
| 19 (UPN12)     | 64  | Female | Ovarian cancer                           | Yes                                       | PR                |
| 20             | 54  | Male   | Gastric cancer                           | Yes                                       | Not Enrolled      |
| 21             | 57  | Male   | Pancreatic cancer                        | Yes                                       | Not Enrolled      |
| 22 (UPN21)     | 58  | Female | Fallopian tube cancer                    | Yes                                       | PR                |
| 23 (UPN19)     | 47  | Female | breast cancer                            | Yes                                       | PR                |
| 24 (UPN4)      | 55  | Female | breast cancer                            | Yes                                       | PR                |
| 25 (UPN20)     | 55  | Male   | Squamous cell lung carcinoma             | Yes                                       | PR                |
| 26 (UPN22)     | 62  | Female | Pancreatic cancer                        | Yes                                       | SD-S              |
| 27             | 62  | Female | Pancreatic cancer                        | No                                        | Not Enrolled      |
| 28             | 53  | Female | Colon cancer                             | Yes                                       | Not Enrolled      |
| 29             | 58  | Female | Breast cancer                            | Yes                                       | Not Enrolled      |
| 30             | 71  | Male   | Esophagus cancer                         | Yes                                       | Not Enrolled      |
| 31             | 55  | Male   | Colon cancer                             | Yes                                       | SD-S              |
| 32             | 62  | Female | Peritoneal carcinomatosis                | Yes                                       | Not Enrolled      |
| 33             | 39  | Female | Ovarian cancer                           | Yes                                       | Not Enrolled      |
| 34             | 64  | Female | Ovarian cancer                           | No                                        | Not Enrolled      |
| 35             | 45  | Female | Breast cancer                            | Yes                                       | Not Enrolled      |

|            |    |        |                                |     |              |
|------------|----|--------|--------------------------------|-----|--------------|
| 36         | 62 | Male   | Esophagus cancer               | Yes | Not Enrolled |
| 37         | 52 | Female | Squamous cell thymic carcinoma | Yes | Not Enrolled |
| 38 (UPN11) | 30 | Female | Ovarian cancer                 | Yes | SD-S         |
| 39 (UPN15) | 41 | Male   | Pancreatic cancer              | No  | SD-S         |
| 40 (UPN16) | 55 | Female | Ovarian cancer                 | Yes | PR           |
| 41         | 44 | Male   | Pancreatic cancer              | Yes | Not Enrolled |
| 42         | 48 | Female | Breast cancer                  | Yes | Not Enrolled |
| 43         | 50 | Female | Pancreatic cancer              | Yes | Not Enrolled |
| 44 (UPN3)  | 57 | Female | Ovarian cancer                 | Yes | SD-S         |
| 45         | 27 | Male   | Cholangiocarcinoma             | Yes | Not Enrolled |
| 46         | 67 | Female | Lung cancer                    | Yes | Not Enrolled |
| 47         | 65 | Male   | Colon cancer                   | Yes | Not Enrolled |
| 48         | 56 | Male   | gastric cancer                 | Yes | Not Enrolled |
| 49 (UPN17) | 71 | Female | Ovarian cancer                 | Yes | PR           |
| 50 (UPN2)  | 56 | Female | Fallopian tube cancer          | Yes | PR           |
| 51 (UPN14) | 49 | Male   | Lung Cancer                    | Yes | SD-E         |
