# Supplementary material for: Manganese is critical for antitumor immune responses via cGAS-STING and improves the efficacy of clinical immunotherapy
Source: PubMed Central journal article supplement (PMC7785004; doi:10.1038/s41422-020-00395-4), 2020-08-24
Supplement: 41422_2020_395_MOESM12_ESM.pdf [file 41422_2020_395_MOESM12_ESM.pdf]

**Supplementary Table 3. gRNA sequences**

|             |                          |
|-------------|--------------------------|
| cGas-gRNA1  | CCGCCC GCGGATCCCGAGGCGCG |
| cGas-gRNA2  | CCCAGAGCGCCGCGAGGGTCCAG  |
| Sting-gRNA1 | CCCACGGCCCAGAGGTCACCGCT  |
| Sting-gRNA2 | CCTCGCACGAACTTGGACTACTG  |
