# Supplementary material for: Manganese is critical for antitumor immune responses via cGAS-STING and improves the efficacy of clinical immunotherapy
Source: PubMed Central journal article supplement (PMC7785004; doi:10.1038/s41422-020-00395-4), 2020-08-24
Supplement: 41422_2020_395_MOESM13_ESM.pdf [file 41422_2020_395_MOESM13_ESM.pdf]

**Supplementary Table 4. Baseline characteristics**

| Characteristics             | All patients<br>(n = 22) | Nasal drop<br>(n = 13) | Inhalation* (n = 20) |
|-----------------------------|--------------------------|------------------------|----------------------|
| Age, years                  |                          |                        |                      |
| Median                      | 56                       | 45                     | 55.5                 |
| Range                       | 30-78                    | 30-78                  | 30-72                |
| Sex                         |                          |                        |                      |
| Female                      | 14 (64%)                 | 9 (69%)                | 11 (65%)             |
| Male                        | 8 (36%)                  | 4 (31%)                | 7 (35%)              |
| Cancer type                 |                          |                        |                      |
| Digestive system cancer     | 9 (41%)                  | 6 (46%)                | 7 (35%)              |
| Gynecological cancer        | 8 (36%)                  | 5 (38%)                | 8 (40%)              |
| Lung cancer                 | 3 (14%)                  | 1 (8%)                 | 3 (15%)              |
| Breast cancer               | 2 (9%)                   | 1 (8%)                 | 2 (10%)              |
| Disease stage at enrollment |                          |                        |                      |
| IV                          | 22 (100%)                | 13(100%)               | 20 (100%)            |
| ECOG                        |                          |                        |                      |
| 0                           | 12 (54%)                 | 7 (54%)                | 11 (55%)             |
| 1                           | 7 (32%)                  | 4 (31%)                | 6 (30%)              |
| 2                           | 3 (14%)                  | 2 (15%)                | 3 (15%)              |
| Metastatic site             |                          |                        |                      |

|                             |          |          |           |
|-----------------------------|----------|----------|-----------|
| Lymph node                  | 20 (91%) | 11 (85%) | 20 (100%) |
| Liver                       | 13 (59%) | 10 (77%) | 11 (55%)  |
| Lung                        | 6 (27%)  | 3 (23%)  | 4 (20%)   |
| Bone                        | 2 (9%)   | 1 (8%)   | 1 (5%)    |
| Previous lines of therapy   |          |          |           |
| Median                      | 3        | 3        | 3         |
| Range                       | 0-17     | 0-7      | 0-17      |
| ≥ 3 lines                   | 13 (59%) | 9 (69%)  | 12 (60%)  |
| Previous surgery            | 17 (77%) | 11 (85%) | 15 (75%)  |
| Previous anti-PD-1 antibody | 6 (27%)  | 4 (31%)  | 6 (30%)   |

\* This cohort contains eleven patients who were transferred from the nasal drop cohort (Cohort 1).
