# Supplementary material for: Manganese is critical for antitumor immune responses via cGAS-STING and improves the efficacy of clinical immunotherapy
Source: PubMed Central journal article supplement (PMC7785004; doi:10.1038/s41422-020-00395-4), 2020-08-24
Supplement: 41422_2020_395_MOESM14_ESM.pdf [file 41422_2020_395_MOESM14_ESM.pdf]

**Supplementary Table 5. The detailed baseline characteristics and enrolled treatment of all patients in the study**

| Patient No. | Age (years) | Sex | Cancer type | Enrolled stage | ECOG | Metastatic site                       | Previous treatment                                                                                                                                               | Enrolled treatment                                |
|-------------|-------------|-----|-------------|----------------|------|---------------------------------------|------------------------------------------------------------------------------------------------------------------------------------------------------------------|---------------------------------------------------|
| UPN1        | 72          | M   | CRC         | IV             | 0    | Inguinal LN; pelvic LN                | Surgery, BEV+FOLFOX×4, BEV+FOLFIRI×4, FOLFIRINOX+anti-PD1×1, BEV+anti-PD-1×2                                                                                     | N1×5, A2×3; Bev×8; anti-PD-1 (Nivolumab)×8        |
| UPN2        | 56          | F   | OC          | IV             | 2    | Pelvic metastasis lesion              | Primary debulking surgery, PC×10, Secondary debulking surgery, DTC×5, (BEV+GP)×4, (anti-PD-1+PC)×4, (AC+anti-PD-1)×1, (nPC+anti-PD-1)×1                          | N1×2, A2×5; nPC×7; anti-PD-1 (Toripalimab)×7      |
| UPN3        | 57          | F   | OC          | IV             | 1    | Pelvic metastasis lesion              | Primary debulking surgery+PC×2, Secondary debulking surgery+PC×5, anti-PD1×2, (nPC+anti-PD-1×8, nPC×4                                                            | N1×2, A2×12; nPC×14; anti-PD-1 (Toripalimab)×14   |
| UPN4        | 55          | F   | BC          | IV             | 0    | Armpit LN; Left chest wall metastases | Modified radical mastectomy, AC×8, navelbine+lobaplatin×2, GP×2, decitabine+anti-PD-1×4, Bev+AC×6, Surgery+radiotherapy, Bev+Liposomal Doxorubicin+Carboplatin×1 | N1×2; A2×4; nP×6; anti-PD-1 (Toripalimab)×6       |
| UPN5        | 78          | F   | CRC         | IV             | 0    | Lung; liver                           | Surgery, radioactive seed implantation (pulmonary metastasis), regorafenib×2, TACE (Liver metastases)                                                            | N1×3; Bev×3; anti-PD-1 (Nivolumab)×3              |
| UPN6        | 56          | M   | HCC         | IV             | 1    | liver                                 | Surgery, TACE×2, Cryocare Surgical System, Sorafenib, Lenvatinib                                                                                                 | N2×5; A2×2; Lenvatinib×7; anti-PD-1 (Nivolumab)×7 |

|       |    |   |     |    |   |                           |                                                                                                                                 |                                                        |
|-------|----|---|-----|----|---|---------------------------|---------------------------------------------------------------------------------------------------------------------------------|--------------------------------------------------------|
| UPN7  | 63 | F | PC  | IV | 0 | Pancreatic lesions        | /                                                                                                                               | N2×2, A1×2, A2×4; nPG×8; anti-PD1 (Nivolumab)×8        |
| UPN8  | 58 | F | OC  | IV | 2 | Pelvic metastasis lesion  | Primary debulking surgery, PC×6, Olaparib maintenance, PC×2+Secondary debulking surgery, nPC×2                                  | N2×1, A1×1, A2×8; nPC×10; anti-PD-1 (Pembrolizumab)×10 |
| UPN9  | 50 | F | CCA | IV | 0 | Liver                     | Surgery, GMOX×2                                                                                                                 | N2×2, A1×2; GP×4; anti-PD1 (Nivolumab)×4               |
| UPN10 | 54 | M | CRC | IV | 1 | Lung; liver               | Surgery, Xelox×4, CET+FOLFIRI×4, CET×5                                                                                          | N2×2, A3×3; nP×5 anti-PD1 (Nivolumab)×5                |
| UPN11 | 30 | F | OC  | IV | 1 | Pelvic metastasis lesion  | Primary debulking surgery+(Liposomal Paclitaxel +Carboplatin)×8, Liposomal Paclitaxel ×3, (Liposomal Doxorubicin+lobaplatin) ×2 | N2×1, A2×13; nPC×14; anti-PD-1 (Pembrolizumab)×14      |
| UPN12 | 64 | F | OC  | IV | 0 | Pelvic metastasis lesion  | PC×1+Interval debulking surgery+(P+lobaplatin)×7, PC×3, (nab-PTX+lobaplatin)×1                                                  | N2×1, A2×6; nPC×7; anti-PD-1 (Nivolumab)×7             |
| UPN13 | 41 | M | CCA | IV | 0 | Liver; retroperitoneal LN | TACE×1                                                                                                                          | N2×3, A1×3; GP×6; anti-PD-1 (Nivolumab)×6              |
| UPN14 | 49 | M | LC  | IV | 1 | Lung                      | Bev+AP×4, Bev+AP+SHR-1210×2, Bev+A+SHR-1210×14, Bev+nab-PTX+DDP×6                                                               | A1×1, A2×2; nP×3; anti-PD-1 (SHR-1210)×3               |
| UPN15 | 41 | M | PC  | IV | 0 | Retroperitoneal LN        | Surgery, radiotherapy                                                                                                           | A2×6; GP×6; anti-PD-1 (Nivolumab)×6                    |
| UPN16 | 55 | F | OC  | IV | 0 | Pelvic metastasis lesion  | Primary debulking surgery, PC×7, Apatinib, Liposomal Doxorubicin×3, (Docetaxel+Cisplatin)×2, Bev+G×6                            | A2×8; nPC×8; anti-PD-1 (Pembrolizumab)×8               |

|       |    |   |    |    |   |                           |                                                                                              |                                                            |
|-------|----|---|----|----|---|---------------------------|----------------------------------------------------------------------------------------------|------------------------------------------------------------|
| UPN17 | 71 | F | OC | IV | 2 | Pelvic metastasis lesion  | Surgery×4, chemotherapy×35, anti-PD-1×8, Niraparib, Olaparib                                 | A2×4; nPC×4; anti-PD-1 (Pembrolizumab)×4                   |
| UPN18 | 69 | M | PC | IV | 1 | Liver; retroperitoneal LN | Surgery, GP×6, S1+ErotinibX1                                                                 | A2×3; FOLFIRINOX×1; Lenvatinib×2; anti-PD-1 (Sintilimab)×3 |
| UPN19 | 47 | F | BC | IV | 0 | Lung; supraclavicular LN  | Modified radical mastectomy (Right)+AC-T×3, Radiotherapy, Modified radical mastectomy (Left) | A3×9; nP×9; anti-PD-1 (Nivolumab)×9                        |
| UPN20 | 55 | M | LC | IV | 1 | Lung                      | GP×5, AP×1                                                                                   | A3×4; nPT×4; anti-PD-1 (Pembrolizumab)×4                   |
| UPN21 | 58 | F | OC | IV | 0 | Neck LN                   | Primary debulking surgery+PC×4, Secondary debulking surgery+PC×4                             | A3×4; nPC×4; anti-PD-1 (Sintilimab)×4                      |
| UPN22 | 62 | F | PC | IV | 0 | Pancreatic lesions        | /                                                                                            | A3×4; nPG×4; anti-PD-1 (Sintilimab)×4                      |

BC, Breast cancer; CCA, Cholangiocarcinoma; CRC, Colorectal cancer; HCC, Hepatocellular carcinoma; LC, Lung cancer; OC, ovarian cancer; PC, Pancreatic Cancer. N1, N2 represent intranasal administration of manganese chloride 0.05 and 0.1 mg/Kg/d, respectively; A1, A2 and A3 represent inhalation of manganese chloride 0.1, 0.2 and 0.2 mg/Kg/d, respectively.
