# Supplementary material for: Manganese is critical for antitumor immune responses via cGAS-STING and improves the efficacy of clinical immunotherapy
Source: Cell Res. 2020 Aug 24;30(11):966–79. doi: 10.1038/s41422-020-00395-4 (PMC7785004; doi:10.1038/s41422-020-00395-4)
Supplement: Supplementary file 15 — Supplementary information, Table S6 [file 41422_2020_395_MOESM15_ESM.pdf]

**Supplementary Table 6. Treatment-emergent adverse events**

|                       | Total patients  |    |                 |    |                 |    | Cohort 1        |    |                 |   | Cohort 2        |    |                 |    |
|-----------------------|-----------------|----|-----------------|----|-----------------|----|-----------------|----|-----------------|---|-----------------|----|-----------------|----|
|                       | Any grade       |    | Grade1-2        |    | Grade3-4        |    | Grade1-2        |    | Grade3-4        |   | Grade1-2        |    | Grade3-4        |    |
|                       | No. of patients | %  | No. of patients | % | No. of patients | %  | No. of patients | %  |
| Any adverse event     | 19              | 86 | 10              | 45 | 9               | 41 | 3               | 14 | 0               | 0 | 7               | 32 | 9               | 41 |
| Peripheral neuropathy | 14              | 64 | 14              | 64 | 0               | 0  | 1               | 5  | 0               | 0 | 13              | 59 | 0               | 0  |
| Leucopenia            | 12              | 55 | 12              | 55 | 0               | 0  | 0               | 0  | 0               | 0 | 12              | 55 | 0               | 0  |
| Nausea                | 8               | 37 | 8               | 37 | 0               | 0  | 0               | 0  | 0               | 0 | 8               | 37 | 0               | 0  |
| Vomiting              | 8               | 37 | 5               | 23 | 3               | 14 | 0               | 0  | 0               | 0 | 5               | 23 | 3               | 14 |
| Thrombocytopenia      | 7               | 32 | 5               | 23 | 2               | 9  | 0               | 0  | 0               | 0 | 5               | 23 | 2               | 9  |
| Neutropenia           | 7               | 32 | 4               | 18 | 3               | 14 | 0               | 0  | 0               | 0 | 4               | 18 | 3               | 14 |
| Fatigue               | 4               | 18 | 4               | 18 | 0               | 0  | 0               | 0  | 0               | 0 | 4               | 18 | 0               | 0  |
| Constipation          | 4               | 18 | 4               | 18 | 0               | 0  | 1               | 5  | 0               | 0 | 3               | 14 | 0               | 0  |
| Fever                 | 4               | 18 | 4               | 18 | 0               | 0  | 1               | 5  | 0               | 0 | 3               | 14 | 0               | 0  |
| Rash                  | 3               | 14 | 3               | 14 | 0               | 0  | 0               | 0  | 0               | 0 | 3               | 14 | 0               | 0  |
| Pruritus              | 3               | 14 | 3               | 14 | 0               | 0  | 0               | 0  | 0               | 0 | 3               | 14 | 0               | 0  |
| Diarrhea              | 2               | 9  | 2               | 9  | 0               | 0  | 0               | 0  | 0               | 0 | 2               | 10 | 0               | 0  |
| Ileus                 | 2               | 9  | 2               | 9  | 0               | 0  | 1               | 5  | 0               | 0 | 1               | 5  | 0               | 0  |
| Pneumonitis           | 2               | 9  | 0               | 0  | 2               | 9  | 0               | 0  | 0               | 0 | 0               | 0  | 2               | 9  |
| Anorexia              | 1               | 5  | 1               | 5  | 0               | 0  | 0               | 0  | 0               | 0 | 1               | 5  | 0               | 0  |
| Myalgia               | 1               | 5  | 1               | 5  | 0               | 0  | 0               | 0  | 0               | 0 | 1               | 5  | 0               | 0  |
| Ascites               | 1               | 5  | 1               | 5  | 0               | 0  | 0               | 0  | 0               | 0 | 1               | 5  | 0               | 0  |
| Hydrothorax           | 1               | 5  | 0               | 0  | 1               | 5  | 0               | 0  | 0               | 0 | 0               | 0  | 1               | 5  |
